# Supplementary material for: Everything causes cancer? Beliefs and attitudes towards cancer prevention among anti-vaxxers, flat earthers, and reptilian conspiracists: online cross sectional survey
Source: PubMed Central journal article supplement — BMJ. 2022 Dec 21;379:e072561. doi: 10.1136/bmj-2022-072561 (PMC9768817; doi:10.1136/bmj-2022-072561), 2022-12-21
Supplement: pays072561.ww1.pdf [file pays072561.ww1.pdf]

This survey is very short (3-5 min) and it will help us a lot with our research. The objective of this study is to know the perceptions of cancer risk. Knowing perceptions about cancer and its underlying factors can help inform and guide cancer prevention efforts.

This study is carried out by researchers from ICO/IDIBELL. Your data will be treated anonymously and the Organic Law 3/2018 on the Protection of Personal Data and Guarantee of Digital Rights will be respected. Ethical approval: PR294/21. Contact: [info@mejorsincancer.org](mailto:info@mejorsincancer.org)

Thank you very much!

---

**I understand the purpose of this study, and I grant consent to the use of my responses for the purposes of this study.**

Yes/No

---

**Age**

<18 / 18-24 / 25-29/ 30-34 / 35-39 / 40-44 / 45-49 / 50-54 / 55-59 / 60-64 / 65-69 / >=70

**Gender**

- Woman
- Man
- Non binary
- DK/NO

**Country of residence:** \_\_\_\_\_

**Were you born in the same country in which you now live?**

- No
- Yes

**[If No] Country of birth:** \_\_\_\_\_

**Education level**

- No studies
- Primary studies completed
- Completed high school Post-high school training other than college (vocational or technical)
- College graduate Master's degree / grad school completed
- Doctoral degree
- DK/NO

**Is your work related to the medical field?**

- No
- Yes
- DK/NO

**Compared with other people your age, how likely are you to get cancer in your lifetime?**

- Very likely
- Likely
- Neither unlikely or likely
- Unlikely
- Very unlikely
- DK/NO

**Have you been vaccinated against COVID-19?**

- Yes, I have received 3 doses
- Yes, I have received 2 doses
- Yes, I have received 1 dose
- No, but I want to get vaccinated
- No, and I don't know if I will get vaccinated
- No, definitively will not get vaccinated
- DK/NO

**[If No] Why haven't you been vaccinated?:** \_\_\_\_\_

**What type of medicine do you prefer?**

- I prefer conventional medicine
- I prefer conventional medicine, complemented with alternative or integrative medicine
- I am not sure
- I prefer alternative or integrative medicine, complemented by conventional medicine
- I prefer alternative or integrative medicine

**How much do you agree that each of these can increase a person's chance of developing cancer?**

*Strongly disagree – Disagree - Not sure – Agree - Strongly agree*

- 1) Exposure to non-ionizing electromagnetic frequencies (WiFi, TV, radio)
- 2) Eating food containing additives
- 3) Living near power lines
- 4) Feeling stressed
- 5) Eating food containing artificial sweeteners
- 6) Using cleaning products
- 7) Using mobile phones
- 8) Eating genetically modified food
- 9) Using aerosol containers
- 10) Physical trauma, for example a punch or squeeze
- 11) Using microwave ovens
- 12) Drinking from plastic bottles
- 13) Smoking any cigarettes at all
- 14) Exposure to another person's cigarette smoke
- 15) Drinking more than 1 unit of alcohol a day
- 16) Eating less than 5 portions of fruit and vegetables a day
- 17) Eating red or processed meat once a day or more
- 18) Being overweight (BMI over 25)
- 19) Getting sunburnt more than once as a child
- 20) Being over 70 years old
- 21) Having a close relative with cancer
- 22) Infection with HPV (Human Papillomavirus)
- 23) Doing less than 30 min of moderate physical activity 5 times a week
- 24) Using deodorants

**How much do you agree with these statements?**

*Strongly disagree – Disagree - Not sure – Agree - Strongly agree*

- It seems like everything causes cancer
- There's not much I can do to reduce the chances to get cancer
- Cancer worries me a lot

**Could you tell us your weight and height?**

Weight: \_\_\_\_ pounds / \_\_\_\_ kg  
Height: \_\_\_\_ feet \_\_\_\_ inches / \_\_\_\_ cm

**Are you a smoker?**

(at least 100 cigarettes throughout your life)

- I am a current smoker
- I am a former smoker
- I never smoked
- DK/NO

**Do you regularly drink alcohol?**

(more than once a week)

- Yes
- No
- DK/NO

**Have you ever been diagnosed with cancer?**

- Yes
- No
- DK/NO

**Do you think the Earth is round or flat?**

- I have always considered Earth to be round (spherical or similar)
- I had always thought Earth was round (spherical or similar), but recently I have doubts
- I had always thought Earth was flat, but recently I have doubts
- I have always considered the Earth to be flat.
- DK/NO

**To what extent do you agree with the following statements?**

*Strongly disagree – Disagree - Not sure – Agree - Strongly agree*

- Among us there are many shape-shifting lizards taking human forms or reptilian humanoids
- Presidents of most countries are reptilian humanoids

**Which types of cancer screening programmes are currently recommended?**

*Screening refers to the use of simple tests across a healthy population to identify those individuals who have a disease, but do not yet have symptoms to detect precancerous lesions or cancer in its early stages*

- Breast cancer
- Lung cancer
- Ovarian cancer
- Colon and rectal cancer
- Cervical cancer
- Prostate cancer
- DK/NO

**Thank you very much for your participation. Please, leave here any comments that you might have.**

---

---

---
