# Supplementary material for: Everything causes cancer? Beliefs and attitudes towards cancer prevention among anti-vaxxers, flat earthers, and reptilian conspiracists: online cross sectional survey
Source: PubMed Central journal article supplement — BMJ. 2022 Dec 21;379:e072561. doi: 10.1136/bmj-2022-072561 (PMC9768817; doi:10.1136/bmj-2022-072561), 2022-12-21
Supplement: pays072561.ww2.pdf [file pays072561.ww2.pdf]

# **Everything causes cancer? Beliefs and attitudes towards cancer prevention among anti-vaxxers, flat-earthers, and reptilian conspiracists: online cross-sectional survey**

## **Supplemental material**

|                                                                                                                                                                   |   |
|-------------------------------------------------------------------------------------------------------------------------------------------------------------------|---|
| Supplemental Figure 1. Overall endorsement of actual and mythical causes. ....                                                                                    | 2 |
| Supplemental Table 1. Descriptive characteristics by type of responders .....                                                                                     | 3 |
| Supplemental Table 2. Cancer awareness measures by sociodemographic factors. ....                                                                                 | 4 |
| Supplemental Table 3. Endorsement of cancer causes by risk factors. ....                                                                                          | 5 |
| Supplemental Table 4. Agreement with the statement ‘ <i>It seems like everything causes cancer</i> ’<br>by sociodemographic and cancer risk factors.....          | 6 |
| Supplemental Table 5. Cancer screening knowledge based on sociodemographic factors,<br>conspiracy beliefs, and health characteristics.....                        | 7 |
| Supplemental Table 6. Weighted analyses conducted using representative population data on<br>age, sex, and education among the respondents residing in Spain..... | 8 |

Supplemental Figure 1. Overall endorsement of actual and mythical causes.

## Endorsement of actual and mythical causes of cancer

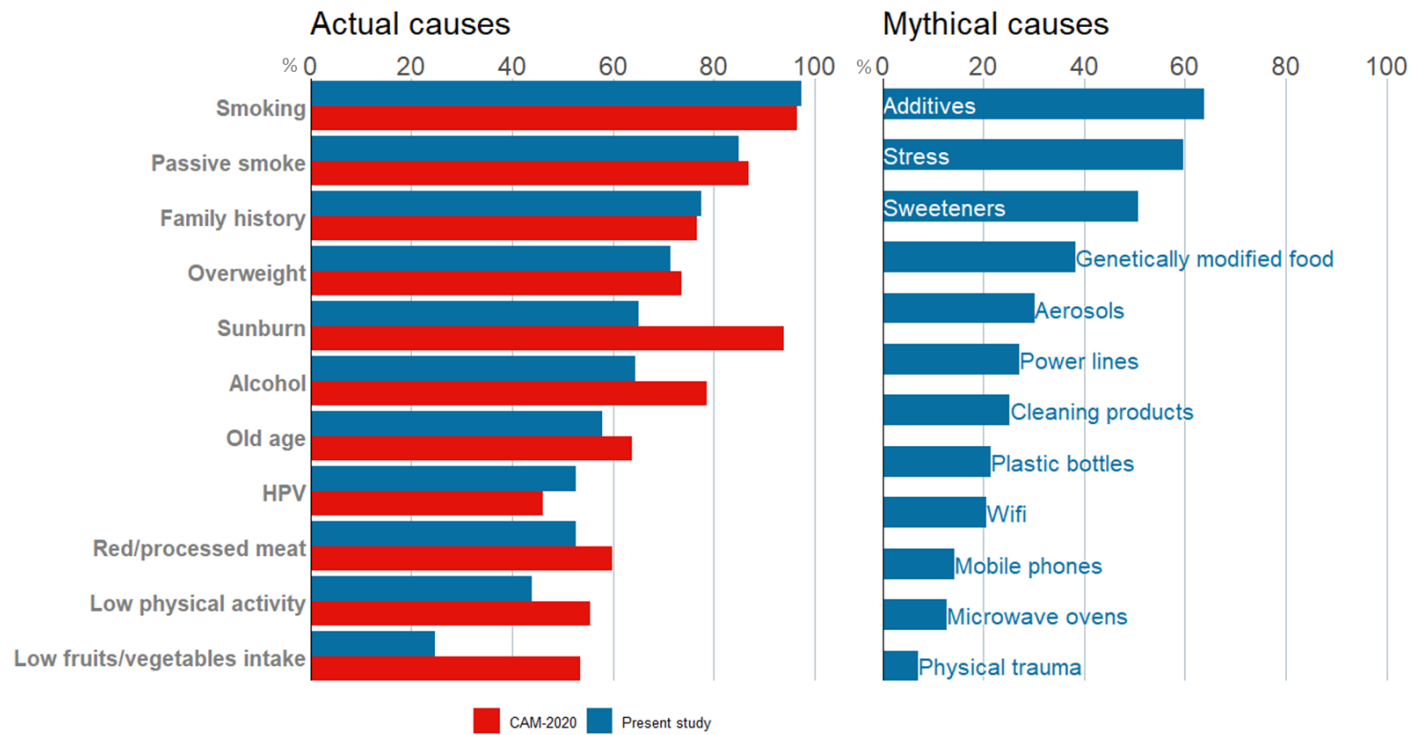

Benchmark data from the Cancer Research UK were included for comparison; cancer awareness measure (CAM-2020) responses refer to the responses online from Connor et al. Awareness of the signs, symptoms, and risk factors of cancer and the barriers to seeking help in the UK: Comparison of survey data collected online and face-to-face. JMIR Cancer 2020;6:e14539. doi:10.2196/14539. HPV= human papillomavirus

**Supplemental Table 1. Descriptive characteristics by type of responders**

|                                                        | Partial responders *                 |            | Full responders |     | P-value † |
|--------------------------------------------------------|--------------------------------------|------------|-----------------|-----|-----------|
|                                                        | N                                    | (%)        | N               | (%) |           |
| <b>Age</b>                                             |                                      |            |                 |     | 0.021     |
|                                                        | <25                                  | 60 (23.1)  | 243 (16.3)      |     |           |
|                                                        | 25–34                                | 101 (38.8) | 657 (44.0)      |     |           |
|                                                        | 35–44                                | 56 (21.5)  | 402 (26.9)      |     |           |
|                                                        | 45+                                  | 34 (13.1)  | 192 (12.9)      |     |           |
|                                                        | NK/NO                                | 9 (3.5)    | 0 (0.0)         |     |           |
| <b>Sex</b>                                             |                                      |            |                 |     | 0.003 ‡   |
|                                                        | Female                               | 41 (15.8)  | 263 (17.6)      |     |           |
|                                                        | Male                                 | 205 (78.8) | 1198 (80.2)     |     |           |
|                                                        | Non binary/others                    | 11 (4.2)   | 19 (1.3)        |     |           |
|                                                        | NK/NO                                | 3 (1.2)    | 14 (0.9)        |     |           |
| <b>Region</b>                                          |                                      |            |                 |     | 0.013     |
|                                                        | Europe                               | 208 (80.0) | 1311 (87.8)     |     |           |
|                                                        | South America                        | 18 (6.9)   | 73 (4.9)        |     |           |
|                                                        | North America                        | 17 (6.5)   | 83 (5.6)        |     |           |
|                                                        | Asia and Oceania                     | 1 (0.4)    | 15 (1.0)        |     |           |
|                                                        | Africa                               | 3 (1.2)    | 2 (0.1)         |     |           |
|                                                        | NK/NO                                | 13 (5.0)   | 10 (0.7)        |     |           |
| <b>Education</b>                                       |                                      |            |                 |     | 0.001     |
|                                                        | Less than college                    | 142 (54.6) | 670 (44.8)      |     |           |
|                                                        | College or more                      | 112 (43.1) | 818 (54.8)      |     |           |
|                                                        | NK/NO                                | 6 (2.3)    | 6 (0.4)         |     |           |
| <b>Medical occupation</b>                              |                                      |            |                 |     | 0.715     |
|                                                        | No                                   | 219 (84.2) | 1289 (86.3)     |     |           |
|                                                        | Yes                                  | 34 (13.1)  | 186 (12.4)      |     |           |
|                                                        | NK/NO                                | 7 (2.7)    | 19 (1.3)        |     |           |
| <b>COVID-19 vaccination</b>                            |                                      |            |                 |     | 0.591     |
|                                                        | 1 dose or more                       | 205 (78.8) | 1285 (86.0)     |     |           |
|                                                        | Unvaccinated                         | 37 (14.2)  | 209 (14.0)      |     |           |
|                                                        | NK/NO                                | 18 (6.9)   | 0 (0.0)         |     |           |
| <b>Believes in flat earth or shapeshifting lizards</b> |                                      |            |                 |     | <0.001    |
|                                                        | No                                   | 7 (2.7)    | 1375 (92.0)     |     |           |
|                                                        | Yes                                  | 7 (2.7)    | 62 (4.1)        |     |           |
|                                                        | NK/NO                                | 246 (94.6) | 57 (3.8)        |     |           |
| <b>Preferences on type of medicine</b>                 |                                      |            |                 |     | 0.090     |
|                                                        | Conventional or unsure               | 225 (86.5) | 1367 (91.5)     |     |           |
|                                                        | Alternative                          | 27 (10.4)  | 112 (7.5)       |     |           |
|                                                        | NK/NO                                | 8 (3.1)    | 15 (1.0)        |     |           |
| <b>Source</b>                                          |                                      |            |                 |     | 0.030     |
|                                                        | Cancer blog                          | 14 (5.4)   | 62 (4.1)        |     |           |
|                                                        | 4Chan, Hispachan, Reddit, and others | 62 (23.8)  | 263 (17.6)      |     |           |
|                                                        | ForoCoches                           | 184 (70.8) | 1169 (78.2)     |     |           |

\* Includes low quality surveys (N=14)

† Chi squared, calculated without missing values

‡ P-value= 0.613 excluding non-binary/others

NK/NO = Not known / no answer

**Supplemental Table 2. Cancer awareness measures by sociodemographic factors.**

|                               |                                             | Total sample<br>(N) | CAM-total ‡<br>% correct (IQR) | CAM ‡<br>% correct (IQR) | CAM-MYCS ‡<br>% correct (IQR) |   |
|-------------------------------|---------------------------------------------|---------------------|--------------------------------|--------------------------|-------------------------------|---|
| <b>Overall</b>                |                                             | 1494                | 47.8 (39.1-60.9)               | 63.6 (45.5-81.8)         | 41.7 (16.7-58.3)              |   |
| <b>Age</b>                    |                                             |                     |                                |                          |                               |   |
|                               | <i>&lt;25 (ref*)</i>                        | 243                 | 56.5 (43.5-65.2)               | 63.6 (54.5-81.8)         | 50.0 (25.0-66.7)              |   |
|                               | <i>25-34</i>                                | 657                 | 47.8 (39.1-60.9)               | † 63.6 (45.5-81.8)       | 33.3 (16.7-58.3)              | † |
|                               | <i>35-44</i>                                | 402                 | 47.8 (39.1-60.9)               | † 63.6 (45.5-81.8)       | 41.7 (16.7-58.3)              | † |
|                               | <i>45+</i>                                  | 192                 | 45.7 (34.8-52.2)               | † 63.6 (36.4-81.8)       | † 33.3 (8.3-50.0)             | † |
| <b>Sex</b>                    |                                             |                     |                                |                          |                               |   |
|                               | <i>Female (ref*)</i>                        | 263                 | 47.8 (39.1-56.5)               | 63.6 (54.5-81.8)         | 25.0 (8.3-50.0)               |   |
|                               | <i>Male</i>                                 | 1198                | 52.2 (39.1-60.9)               | † 63.6 (45.5-81.8)       | 41.7 (16.7-58.3)              | † |
|                               | <i>Non binary</i>                           | 19                  | 52.2 (39.1-65.2)               | 54.5 (36.4-81.8)         | † 41.7 (16.7-66.7)            |   |
| <b>Education</b>              |                                             |                     |                                |                          |                               |   |
|                               | <i>Less than college (ref*)</i>             | 670                 | 47.8 (34.8-56.5)               | 54.5 (45.5-72.7)         | 33.3 (8.3-50.0)               |   |
|                               | <i>College or more</i>                      | 818                 | 52.2 (39.1-65.2)               | † 72.7 (54.5-81.8)       | † 41.7 (16.7-58.3)            | † |
| <b>Region</b>                 |                                             |                     |                                |                          |                               |   |
|                               | <i>Europe (ref*)</i>                        | 1311                | 47.8 (39.1-60.9)               | 63.6 (45.5-81.8)         | 41.7 (16.7-58.3)              |   |
|                               | <i>Others</i>                               | 173                 | 47.8 (39.1-58.7)               | † 63.6 (45.5-81.8)       | 33.3 (16.7-58.3)              |   |
| <b>Medical occupation</b>     |                                             |                     |                                |                          |                               |   |
|                               | <i>No (ref*)</i>                            | 1289                | 47.8 (39.1-60.9)               | 63.6 (45.5-81.8)         | 41.7 (16.7-58.3)              |   |
|                               | <i>Yes</i>                                  | 186                 | 52.2 (43.5-69.6)               | † 72.7 (54.5-90.9)       | † 33.3 (8.3-58.3)             |   |
| <b>BMI</b>                    |                                             |                     |                                |                          |                               |   |
|                               | <i>&lt;25 (ref*)</i>                        | 814                 | 52.2 (39.1-65.2)               | 63.6 (54.5-81.8)         | 41.7 (16.7-58.3)              |   |
|                               | <i>25-29.9</i>                              | 449                 | 47.8 (34.8-60.9)               | 63.6 (45.5-81.8)         | 33.3 (16.7-58.3)              |   |
|                               | <i>30+</i>                                  | 158                 | 47.8 (39.1-60.9)               | 54.5 (45.5-72.7)         | † 41.7 (16.7-58.3)            | † |
| <b>Alcohol</b>                |                                             |                     |                                |                          |                               |   |
|                               | <i>No (ref*)</i>                            | 1003                | 47.8 (39.1-60.9)               | 63.6 (45.5-81.8)         | 41.7 (16.7-58.3)              |   |
|                               | <i>Yes</i>                                  | 436                 | 47.8 (39.1-60.9)               | 63.6 (45.5-72.7)         | 41.7 (16.7-58.3)              |   |
| <b>Smoking</b>                |                                             |                     |                                |                          |                               |   |
|                               | <i>Never (ref*)</i>                         | 895                 | 52.2 (39.1-65.2)               | 63.6 (54.5-81.8)         | 41.7 (16.7-58.3)              |   |
|                               | <i>Ever</i>                                 | 527                 | 47.8 (34.8-60.9)               | † 63.6 (45.5-81.8)       | 33.3 (8.3-58.3)               | † |
| <b>Past history of cancer</b> |                                             |                     |                                |                          |                               |   |
|                               | <i>No (ref*)</i>                            | 1406                | 47.8 (39.1-60.9)               | 63.6 (45.5-81.8)         | 41.7 (16.7-58.3)              |   |
|                               | <i>Yes</i>                                  | 64                  | 47.8 (34.8-59.8)               | 63.6 (45.5-81.8)         | 33.3 (8.3-58.3)               |   |
| <b>Source</b>                 |                                             |                     |                                |                          |                               |   |
|                               | <i>Cancer blog (ref*)</i>                   | 62                  | 43.5 (34.8-47.8)               | 72.7 (54.5-81.8)         | 16.7 (0.0-35.4)               |   |
|                               | <i>4Chan, Hispachan, Reddit, and others</i> | 263                 | 52.2 (39.1-65.2)               | † 63.6 (45.5-81.8)       | 41.7 (16.7-66.7)              | † |
|                               | <i>ForoCoches</i>                           | 1169                | 47.8 (39.1-60.9)               | 63.6 (45.5-81.8)         | 41.7 (16.7-58.3)              |   |

‡ Refers to the median percentage of correct responses for the 11 CAM, 12 CAM-MYCS, and 23 total CAM items. \* ref= reference category in multivariable analysis. † Categories associated with independent variables in the multivariable regression analyses. Models were adjusted for COVID-19 vaccination, conspiracy beliefs, preferences for type of medicine, age, sex, education level, region, medical occupation, BMI, alcohol intake, smoking, past history of cancer, and source of the survey. BMI: Body Mass Index; CAM: Cancer Awareness Measure; CAM-MYCS: Cancer Awareness Measure- MYthical Causes Scale; CAM-total: aggregated cancer awareness measures; IQR: interquartile range.

**Supplemental Table 3. Endorsement of cancer causes by risk factors.**

| Item evaluated                            | Risk factor    | Total sample (N) | Endorsement N (%) | OR (95%-CI)      | P-value       |
|-------------------------------------------|----------------|------------------|-------------------|------------------|---------------|
| <i>Being over 70 years old</i>            | <b>Age</b>     |                  |                   |                  |               |
|                                           | <i>Overall</i> | 1494             | 866 (58.0)        |                  |               |
|                                           | <i>&lt;25</i>  | 243              | 173 (71.2)        | Reference        |               |
|                                           | <i>25-34</i>   | 657              | 376 (57.2)        | 0.53 (0.37-0.75) | <0.001        |
|                                           | <i>35-44</i>   | 402              | 223 (55.5)        | 0.51 (0.35-0.74) | <0.001        |
|                                           | <i>45+</i>     | 192              | 94 (49.0)         | 0.46 (0.29-0.72) | 0.001         |
|                                           |                |                  |                   |                  | P-trend=0.003 |
| <i>Being overweight (BMI over 25)</i>     | <b>BMI</b>     |                  |                   |                  |               |
|                                           | <i>Overall</i> | 1494             | 1066 (71.4)       |                  |               |
|                                           | <i>&lt;25</i>  | 814              | 606 (74.4)        | Reference        |               |
|                                           | <i>25-29.9</i> | 449              | 310 (69.0)        | 0.82 (0.63-1.07) | 0.144         |
|                                           | <i>30+</i>     | 158              | 101 (63.9)        | 0.64 (0.44-0.93) | 0.021         |
|                                           |                |                  |                   |                  | P-trend=0.015 |
| <i>Smoking any cigarettes at all</i>      | <b>Smoking</b> |                  |                   |                  |               |
|                                           | <i>Overall</i> | 1494             | 1455 (97.4)       |                  |               |
|                                           | <i>Never</i>   | 895              | 873 (97.5)        | Reference        |               |
|                                           | <i>Ever</i>    | 527              | 513 (97.3)        | 1.06 (0.47-2.35) | 0.893         |
| <i>Passive smoking</i>                    | <b>Smoking</b> |                  |                   |                  |               |
|                                           | <i>Overall</i> | 1494             | 1271 (85.1)       |                  |               |
|                                           | <i>Never</i>   | 895              | 788 (88.0)        | Reference        |               |
|                                           | <i>Ever</i>    | 527              | 427 (81.0)        | 0.60 (0.43-0.84) | 0.003         |
| <i>Drinking &gt;1 unit of alcohol/day</i> | <b>Alcohol</b> |                  |                   |                  |               |
|                                           | <i>Overall</i> | 1494             | 964 (64.5)        |                  |               |
|                                           | <i>No</i>      | 1003             | 676 (67.4)        | Reference        |               |
|                                           | <i>Yes</i>     | 436              | 257 (58.9)        | 0.77 (0.60-0.99) | 0.039         |

Models were adjusted for COVID-19 vaccination, conspiracy beliefs, preferences for type of medicine, age, sex, education level, region, medical occupation, BMI, alcohol intake, smoking, past history of cancer, and source of the survey.

BMI: Body Mass Index, OR: Odds Ratio, CI: Confidence Interval.

**Supplemental Table 4. Agreement with the statement ‘It seems like everything causes cancer’ by sociodemographic and cancer risk factors.**

|                               | Agreement with the statement ‘It seems like everything causes cancer’ |                         | OR (95%-CI) | P-value          |        |
|-------------------------------|-----------------------------------------------------------------------|-------------------------|-------------|------------------|--------|
|                               | Strongly disagree, disagree, or not sure                              | Agree or strongly agree |             |                  |        |
|                               | N (%)                                                                 | N (%)                   |             |                  |        |
| <b>Age</b>                    |                                                                       |                         |             |                  |        |
|                               | <25                                                                   | 124 (51.0%)             | 119 (49.0%) | Reference        |        |
|                               | 25-34                                                                 | 334 (50.8%)             | 323 (49.2%) | 0.91 (0.66-1.26) | 0.579  |
|                               | 35-44                                                                 | 236 (58.7%)             | 166 (41.3%) | 0.65 (0.45-0.93) | 0.017  |
|                               | 45+                                                                   | 127 (66.1%)             | 65 (33.9%)  | 0.48 (0.30-0.74) | 0.001  |
|                               |                                                                       |                         |             | P-trend<0.001    |        |
| <b>Sex</b>                    |                                                                       |                         |             |                  |        |
|                               | Female                                                                | 137 (52.1%)             | 126 (47.9%) | Reference        |        |
|                               | Male                                                                  | 666 (55.6%)             | 532 (44.4%) | 0.60 (0.44-0.81) | 0.001  |
|                               | Non binary                                                            | 10 (52.6%)              | 9 (47.4%)   | 0.72 (0.26-2.00) | 0.524  |
| <b>Region</b>                 |                                                                       |                         |             |                  |        |
|                               | Europe                                                                | 718 (54.8%)             | 593 (45.2%) | Reference        |        |
|                               | Others                                                                | 95 (54.9%)              | 78 (45.1%)  | 1.56 (1.00-2.45) | 0.052  |
| <b>Education</b>              |                                                                       |                         |             |                  |        |
|                               | Less than college                                                     | 353 (52.7%)             | 317 (47.3%) | Reference        |        |
|                               | College or more                                                       | 465 (56.8%)             | 353 (43.2%) | 0.87 (0.06-1.68) | 0.216  |
| <b>Medical occupation</b>     |                                                                       |                         |             |                  |        |
|                               | No                                                                    | 696 (54.0%)             | 593 (46.0%) | Reference        |        |
|                               | Yes                                                                   | 116 (62.4%)             | 70 (37.6%)  | 0.73 (0.52-1.03) | 0.070  |
| <b>BMI</b>                    |                                                                       |                         |             |                  |        |
|                               | <25                                                                   | 450 (55.3%)             | 364 (44.7%) | Reference        |        |
|                               | 25-29.9                                                               | 240 (53.5%)             | 209 (46.5%) | 1.14 (0.89-1.46) | 0.295  |
|                               | 30+                                                                   | 88 (55.7%)              | 70 (44.3%)  | 1.08 (0.75-1.55) | 0.696  |
|                               |                                                                       |                         |             | P-trend=0.655    |        |
| <b>Alcohol</b>                |                                                                       |                         |             |                  |        |
|                               | No                                                                    | 575 (57.3%)             | 428 (42.7%) | Reference        |        |
|                               | Yes                                                                   | 212 (48.6%)             | 224 (51.4%) | 1.56 (1.22-1.98) | <0.001 |
| <b>Smoking</b>                |                                                                       |                         |             |                  |        |
|                               | Never                                                                 | 497 (55.5%)             | 398 (44.5%) | Reference        |        |
|                               | Ever                                                                  | 280 (53.1%)             | 247 (46.9%) | 1.07 (0.85-1.36) | 0.565  |
| <b>Past history of cancer</b> |                                                                       |                         |             |                  |        |
|                               | No                                                                    | 770 (54.8%)             | 636 (45.2%) | Reference        |        |
|                               | Yes                                                                   | 41 (64.1%)              | 23 (35.9%)  | 0.92 (0.53-1.59) | 0.757  |
| <b>Source</b>                 |                                                                       |                         |             |                  |        |
|                               | Cancer blog                                                           | 48 (77.4%)              | 14 (22.6%)  | Reference        |        |
|                               | Hispanchan, 4Chan, Reddit, and others                                 | 157 (59.7%)             | 106 (40.3%) | 1.98 (0.96-4.08) | 0.064  |
|                               | ForoCoches                                                            | 616 (52.7%)             | 553 (47.3%) | 3.68 (1.79-7.56) | <0.001 |

Models were adjusted for COVID-19 vaccination, conspiracy beliefs, preferences for type of medicine, age, sex, education level, region, medical occupation, BMI, alcohol intake, smoking, past history of cancer, and source of the survey.

BMI: Body Mass Index, OR: Odds Ratio, CI: Confidence Interval.

**Supplemental Table 5. Cancer screening knowledge based on sociodemographic factors, conspiracy beliefs, and health characteristics.**

|                                                        | Total sample<br>(N) | Established                  |                                  |                                | Non-established            |                             |                                |
|--------------------------------------------------------|---------------------|------------------------------|----------------------------------|--------------------------------|----------------------------|-----------------------------|--------------------------------|
|                                                        |                     | Breast<br>% correct (95% CI) | Colorectal<br>% correct (95% CI) | Cervical<br>% correct (95% CI) | Lung<br>% correct (95% CI) | Ovary<br>% correct (95% CI) | Prostate<br>% correct (95% CI) |
| <b>Overall</b>                                         | 1445                | 86.9 (85.1-88.6)             | 69.3 (66.9-71.7)                 | 50.0 (47.4-52.6)               | 73.6 (71.2-75.8)           | 66.0 (63.5-68.5)            | 27.9 (25.6-30.3)               |
| <b>COVID-19 vaccination</b>                            |                     |                              |                                  |                                |                            |                             |                                |
| <i>1 dose or more (ref*)</i>                           | 1241                | 88.0 (86.1-89.8)             | 69.9 (67.2-72.4)                 | 50.4 (47.6-53.3)               | 73.8 (71.3-76.2)           | 66.3 (63.6-68.9)            | 27.6 (25.1-30.1)               |
| <i>Unvaccinated</i>                                    | 204                 | 80.4 (74.3-85.6)             | 66.2 (59.2-72.6)                 | 47.5 (40.5-54.6)               | 72.1 (65.4-78.1)           | 64.2 (57.2-70.8)            | 29.9 (23.7-36.7)               |
| <b>Believes in flat earth or shapeshifting lizards</b> |                     |                              |                                  |                                |                            |                             |                                |
| <i>No (ref*)</i>                                       | 1375                | 87.3 (85.5-89.1)             | 70.3 (67.8-72.7)                 | 50.5 (47.9-53.2)               | 73.6 (71.2-75.9)           | 65.8 (63.2-68.3)            | 27.2 (24.9-29.6)               |
| <i>Yes</i>                                             | 62                  | 79.0 (66.8-88.3)             | 51.6 (38.6-64.5) †               | 41.9 (29.5-55.2)               | 72.6 (59.8-83.1)           | 69.4 (56.3-80.4)            | 37.1 (25.2-50.3)               |
| <b>Preferences on type of medicine</b>                 |                     |                              |                                  |                                |                            |                             |                                |
| <i>Conventional or unsure (ref*)</i>                   | 1321                | 87.6 (85.7-89.3)             | 70.1 (67.5-72.6)                 | 50.6 (47.8-53.3)               | 73.8 (71.3-76.2)           | 66.2 (63.5-68.7)            | 26.9 (24.6-29.4)               |
| <i>Alternative</i>                                     | 110                 | 80.0 (71.3-87.0)             | 60.0 (50.2-69.2)                 | 43.6 (34.2-53.4)               | 69.1 (59.6-77.6)           | 64.5 (54.9-73.4)            | 37.3 (28.2-47.0)               |
| <b>Age</b>                                             |                     |                              |                                  |                                |                            |                             |                                |
| <i>&lt;25 (ref*)</i>                                   | 237                 | 80.6 (75.0-85.4)             | 60.8 (54.2-67.0)                 | 40.1 (33.8-46.6)               | 65.8 (59.4-71.8)           | 64.1 (57.7-70.2)            | 26.2 (20.7-32.2)               |
| <i>25-34</i>                                           | 634                 | 89.0 (86.3-91.3) †           | 68.8 (65.0-72.4)                 | 52.2 (48.2-56.2) †             | 73.2 (69.6-76.6) †         | 62.8 (58.9-66.6)            | 27.4 (24.0-31.1)               |
| <i>35-44</i>                                           | 387                 | 88.9 (85.3-91.8)             | 71.6 (66.8-76.0)                 | 55.0 (49.9-60.1) †             | 74.2 (69.5-78.5) †         | 66.7 (61.7-71.3)            | 26.4 (22.0-31.0)               |
| <i>45+</i>                                             | 187                 | 84.0 (77.9-88.9)             | 77.5 (70.9-83.3) †               | 44.9 (37.7-52.3)               | 83.4 (77.3-88.4) †         | 78.1 (71.5-83.8) †          | 34.8 (28.0-42.1) †             |
| <b>Sex</b>                                             |                     |                              |                                  |                                |                            |                             |                                |
| <i>Female (ref*)</i>                                   | 253                 | 87.4 (82.6-91.2)             | 71.5 (65.6-77.0)                 | 68.0 (61.9-73.7)               | 82.6 (77.4-87.1)           | 69.6 (63.5-75.2)            | 40.3 (34.2-46.6)               |
| <i>Male</i>                                            | 1160                | 87.2 (85.1-89.0)             | 69.3 (66.6-72.0)                 | 46.3 (43.4-49.2) †             | 71.6 (68.9-74.2) †         | 65.4 (62.6-68.2)            | 25.1 (22.6-27.7) †             |
| <i>Non binary</i>                                      | 19                  | 78.9 (54.4-93.9)             | 52.6 (28.9-75.6)                 | 42.1 (20.3-66.5) †             | 63.2 (38.4-83.7)           | 52.6 (28.9-75.6)            | 31.6 (12.6-56.6)               |
| <b>Education</b>                                       |                     |                              |                                  |                                |                            |                             |                                |
| <i>Less than college (ref*)</i>                        | 642                 | 84.3 (81.2-87.0)             | 65.7 (61.9-69.4)                 | 43.9 (40.0-47.9)               | 70.4 (66.7-73.9)           | 63.9 (60.0-67.6)            | 30.1 (26.5-33.8)               |
| <i>College or more</i>                                 | 797                 | 89.2 (86.8-91.3)             | 72.3 (69.0-75.4)                 | 55.1 (51.6-58.6) †             | 75.9 (72.8-78.8)           | 67.8 (64.4-71.0)            | 26.0 (23.0-29.2) †             |
| <b>Region</b>                                          |                     |                              |                                  |                                |                            |                             |                                |
| <i>Europe (ref*)</i>                                   | 1269                | 88.2 (86.3-89.9)             | 71.6 (69.1-74.1)                 | 50.4 (47.6-53.1)               | 74.1 (71.6-76.5)           | 66.0 (63.4-68.6)            | 26.4 (24.0-28.9)               |
| <i>Others</i>                                          | 169                 | 77.5 (70.5-83.6)             | 53.3 (45.4-61.0) †               | 47.9 (40.2-55.7)               | 71.6 (64.2-78.3) †         | 66.9 (59.2-73.9)            | 39.1 (31.7-46.8)               |
| <b>Medical occupation</b>                              |                     |                              |                                  |                                |                            |                             |                                |
| <i>No (ref*)</i>                                       | 1248                | 86.1 (84.0-87.9)             | 68.1 (65.4-70.7)                 | 47.4 (44.6-50.2)               | 72.8 (70.3-75.3)           | 65.3 (62.6-67.9)            | 26.9 (24.5-29.5)               |
| <i>Yes</i>                                             | 179                 | 92.7 (87.9-96.1) †           | 77.7 (70.8-83.5) †               | 68.7 (61.4-75.4) †             | 78.2 (71.4-84.0)           | 69.8 (62.5-76.5)            | 35.2 (28.2-42.7)               |
| <b>BMI</b>                                             |                     |                              |                                  |                                |                            |                             |                                |
| <i>&lt;25 (ref*)</i>                                   | 814                 | 86.6 (84.1-88.9)             | 68.2 (64.9-71.4)                 | 49.9 (46.4-53.4)               | 73.8 (70.7-76.8)           | 66.5 (63.1-69.7)            | 29.0 (25.9-32.2)               |
| <i>25-29.9</i>                                         | 449                 | 86.6 (83.1-89.6)             | 69.0 (64.5-73.3)                 | 49.0 (44.3-53.7)               | 75.7 (71.5-79.6)           | 67.7 (63.2-72.0)            | 26.9 (22.9-31.3)               |
| <i>30+</i>                                             | 158                 | 88.0 (81.9-92.6)             | 76.6 (69.2-82.9)                 | 54.4 (46.3-62.4)               | 65.8 (57.9-73.2) †         | 58.2 (50.1-66.0) †          | 24.1 (17.6-31.5)               |
| <b>Alcohol</b>                                         |                     |                              |                                  |                                |                            |                             |                                |
| <i>No (ref*)</i>                                       | 1003                | 87.0 (84.8-89.1)             | 67.9 (64.9-70.8)                 | 50.6 (47.5-53.8)               | 73.8 (70.9-76.5)           | 66.3 (63.3-69.2)            | 27.6 (24.9-30.5)               |
| <i>Yes</i>                                             | 436                 | 86.9 (83.4-89.9)             | 72.9 (68.5-77.1)                 | 49.1 (44.3-53.9)               | 72.7 (68.3-76.8)           | 65.1 (60.5-69.6)            | 28.4 (24.2-32.9)               |
| <b>Smoking</b>                                         |                     |                              |                                  |                                |                            |                             |                                |
| <i>Never (ref*)</i>                                    | 895                 | 86.4 (83.9-88.5)             | 68.7 (65.6-71.7)                 | 50.3 (47.0-53.6)               | 75.1 (72.1-77.9)           | 67.3 (64.1-70.3)            | 28.2 (25.2-31.2)               |
| <i>Ever</i>                                            | 527                 | 88.0 (85.0-90.7)             | 70.4 (66.3-74.3)                 | 50.5 (46.1-54.8)               | 71.0 (66.9-74.8)           | 63.2 (58.9-67.3)            | 27.3 (23.6-31.3)               |
| <b>Past history of cancer</b>                          |                     |                              |                                  |                                |                            |                             |                                |
| <i>No (ref*)</i>                                       | 1366                | 87.0 (85.1-88.8)             | 69.0 (66.5-71.5)                 | 50.0 (47.3-52.7)               | 74.1 (71.7-76.4)           | 66.3 (63.7-68.8)            | 27.8 (25.5-30.3)               |
| <i>Yes</i>                                             | 63                  | 84.1 (72.7-92.1)             | 74.6 (62.1-84.7)                 | 49.2 (36.4-62.1)               | 69.8 (57.0-80.8) †         | 63.5 (50.4-75.3)            | 31.7 (20.6-44.7)               |
| <b>Source</b>                                          |                     |                              |                                  |                                |                            |                             |                                |
| <i>Cancer blog (ref*)</i>                              | 60                  | 86.7 (75.4-94.1)             | 66.7 (53.3-78.3)                 | 56.7 (43.2-69.4)               | 75.0 (62.1-85.3)           | 65.0 (51.6-76.9)            | 43.3 (30.6-56.8)               |
| <i>4Chan, Hispachan, Reddit, and others</i>            | 254                 | 79.5 (74.0-84.3)             | 57.1 (50.8-63.3)                 | 47.6 (41.4-54.0)               | 77.6 (71.9-82.5) †         | 72.8 (66.9-78.2) †          | 37.4 (31.4-43.7)               |
| <i>ForoCoches</i>                                      | 1131                | 88.6 (86.6-90.4)             | 72.2 (69.5-74.8) †               | 50.2 (47.3-53.2)               | 72.6 (69.9-75.2)           | 64.5 (61.7-67.3)            | 24.9 (22.4-27.6)               |

\* Reference category in multivariable analyses. † Categories associated with independent variables in the multivariable regression analyses. Models were adjusted for COVID-19 vaccination, conspiracy beliefs, preferences for type of medicine, age, sex, education level, region, medical occupation, BMI, alcohol intake, smoking, past history †, and source of the survey. BMI: Body Mass Index. CI: Confidence Interval.

**Supplemental Table 6. Weighted analyses conducted using representative population data on age, sex, and education among the respondents residing in Spain.**

|                                                        | Adjusted % | CAM-total<br>% correct (IQR) | CAM<br>% correct (IQR) | CAM-MYCS<br>% correct (IQR) |
|--------------------------------------------------------|------------|------------------------------|------------------------|-----------------------------|
| <b>Overall</b>                                         | 100.0      | 47.8 (34.8-56.5)             | 63.6 (45.5-81.8)       | 33.3 (8.3-50.0)             |
| <b>COVID-19 vaccination</b>                            |            |                              |                        |                             |
| <i>1 dose or more (ref*)</i>                           | 87.5       | 47.8 (34.8-60.9)             | 63.6 (45.5-81.8)       | 33.3 (8.3-58.3)             |
| <i>Unvaccinated</i>                                    | 12.5       | 43.5 (34.8-47.8)             | 54.5 (45.5-81.8)       | 25.0 (8.3-50.0)             |
| <b>Believes in flat earth or shapeshifting lizards</b> |            |                              |                        |                             |
| <i>No (ref*)</i>                                       | 91.4       | 47.8 (34.8-60.9)             | 63.6 (45.5-81.8)       | 33.3 (8.3-50.0)             |
| <i>Yes</i>                                             | 2.8        | 47.8 (39.1-47.8)             | 45.5 (45.5-72.7) †     | 41.7 (8.3-50.0)             |
| <b>Preferences on type of medicine</b>                 |            |                              |                        |                             |
| <i>Conventional or unsure (ref*)</i>                   | 94.1       | 47.8 (34.8-60.9)             | 63.6 (45.5-81.8)       | 33.3 (8.3-50.0)             |
| <i>Alternative</i>                                     | 4.8        | 43.5 (34.8-47.8)             | 54.5 (36.4-72.7)       | 25.0 (8.3-50.0)             |
| <b>Medical occupation</b>                              |            |                              |                        |                             |
| <i>No (ref*)</i>                                       | 85.4       | 43.5 (34.8-56.5)             | 63.6 (45.5-72.7)       | 33.3 (8.3-50.0)             |
| <i>Yes</i>                                             | 14.0       | 52.2 (34.8-65.2)             | 72.7 (54.5-90.9)       | 33.3 (8.3-50.0)             |
| <b>BMI</b>                                             |            |                              |                        |                             |
| <i>&lt;25 (ref*)</i>                                   | 49.3       | 47.8 (39.1-60.9)             | 63.6 (45.5-81.8)       | 33.3 (8.3-50.0)             |
| <i>25-29.9</i>                                         | 30.4       | 43.5 (34.8-56.5)             | 63.6 (45.5-81.8)       | 25.0 (8.3-50.0)             |
| <i>30+</i>                                             | 13.2       | 47.8 (34.8-52.2)             | 54.5 (36.4-72.7)       | 33.3 (8.3-50.0)             |
| <b>Alcohol</b>                                         |            |                              |                        |                             |
| <i>No (ref*)</i>                                       | 70.2       | 47.8 (34.8-56.5)             | 63.6 (45.5-81.8)       | 25.0 (8.3-50.0)             |
| <i>Yes</i>                                             | 24.2       | 43.5 (39.1-60.9)             | 63.6 (45.5-72.7)       | 41.7 (16.7-58.3)            |
| <b>Smoking</b>                                         |            |                              |                        |                             |
| <i>Never (ref*)</i>                                    | 49.0       | 47.8 (39.1-60.9)             | 63.6 (45.5-81.8)       | 33.3 (8.3-58.3)             |
| <i>Ever</i>                                            | 45.0       | 43.5 (34.8-52.2)             | 63.6 (45.5-72.7)       | 25.0 (8.3-50.0)             |
| <b>Past history of cancer</b>                          |            |                              |                        |                             |
| <i>No (ref*)</i>                                       | 95.9       | 47.8 (34.8-60.9)             | 63.6 (45.5-81.8)       | 33.3 (8.3-50.0)             |
| <i>Yes</i>                                             | 3.0        | 43.5 (34.8-52.2)             | 54.5 (45.5-81.8)       | 25.0 (8.3-50.0)             |

\* Reference category in multivariable analyses. † Categories associated with independent variables in the multivariable regression analyses. Models were adjusted for COVID-19 vaccination, conspiracy beliefs, preferences for type of medicine, age, sex, education level, medical occupation, BMI, alcohol intake, smoking, and past history of cancer. Percentages are not added to the total because of missing values. CAM: Cancer Awareness Measure, CAM-MYCS: Cancer Awareness Measure-MYthical Causes Scale, CAM-total: aggregated cancer awareness measures. BMI: Body Mass Index; IQR: Interquartile Range.
